# Supplementary material for: Practical considerations for quantitative and reproducible measurements with stimulated Raman scattering microscopy
Source: Royal Society of Chemistry journal article supplement (doi:10.1039/d2an00817c), 2022-01-01
Supplement: d2an00817c1.pdf [file d2an00817c1.pdf]

## Supplementary information

TEM grid in propanediol 2935  $\text{cm}^{-1}$

Damaged piezo stage stacks →

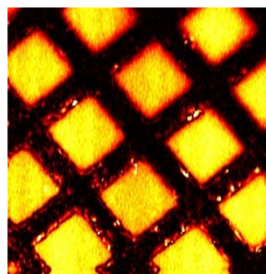

*Figure S 1: SRS image of propanediol within a TEM grid at 2935  $\text{cm}^{-1}$  (dimensions 50  $\mu\text{m}$  x 50  $\mu\text{m}$ ), revealing some irregularity in the stage scanning due to piezo stage damage.*

## Information to be optimised and recorded

### Sample preparation and parameters

- Sample preparation methods, thickness, storage conditions and any prior analysis.
- Details of the substrate used e.g. glass coverslip type and thickness.
- Relevant environmental conditions such as temperature and humidity
- Any visible damage to the sample (e.g. before vs after analysis, consider presence of pigments or strong absorbers that may make the sample more vulnerable to damage).

### Laser alignment and power

- Temporal overlap of the beams optimised?
- Spatial overlap of the beams optimised?
- Laser power at the sample for the pump (for the required wavenumbers) and Stokes beams

### Focusing lenses

- Objective lens magnification and NA
- Condenser lens magnification and NA
- Has the position of the condenser been optimised?
- Medium for the objective lens (air, water, oil etc)
- Medium for the condenser lens
- Check the objective lens correction ring is optimised to the correct thickness of coverslip/dish etc.

### Detection

- Detector gains
- Phase of the lock-in amplifier
- Sensitivity settings of the lock-in amplifier
- Lock-in amplifier gain off-set settings
- details of any filters used

### Image acquisition parameters

- Wavenumbers targeted
- Image size (number of pixels)
- Field of view dimensions (including details of any zoom factor applied)
- Pixel dwell time
- Line or frame averaging/accumulations
- Details of depth stack acquisitions (i.e. depth increments, consider sampling intervals based on axial resolution to avoid over-sampling).
- Details of wavelength scanning (lambda scans) wavelength increments to the pump beam.
